# Supplementary material for: Perfluoroalkyl acids in sediment and water surrounding historical fire training areas at Barksdale Air Force Base
Source: PeerJ. 2022 Mar 9;10:e13054. doi: 10.7717/peerj.13054 (PMC8917801; doi:10.7717/peerj.13054)
Supplement: Supplemental Information 1 — Analytical results of sediment and water grab samples [file peerj-10-13054-s001.xlsx]

## Sheet: Monthly (NF+NQ)
Perfluorinated compounds detected in sediment grab samples from locations of concern at Barksdale Air Force Base									Perfluorinated compounds detected in water grab samples from locations of concern at Barksdale Air Force Base
Month	Location	Concentration (ng/g)							Month	Location	Concentration (ng/mL)
		PFBS	PFOS	PFHxS	PFOA	PFNA	PFHpA				PFBS	PFOS	PFHxS	PFOA	PFNA	PFHpA
August									August
	ExUp	NF	1.01747	NQ	NF	NF	NF			ExUp	NQ	0.0245228	0.0441293	0.0259778	NQ	0.0157004
	Up	NF	NQ	NQ	NF	NF	NF			Up	0.0339325	0.0611685	0.104861	0.0314798	NQ	0.0209252
	WB	NF	1.0265	NQ	NQ	NF	NF			WB	0.0275	0.180667	0.189333	0.0536667	NQ	0.032
	UT	NF	0.430534	NQ	NF	NF	NF			FTA-1	0.03	0.153	0.1905	0.0565	NQ	0.0395
	SCB	NF	NQ	NQ	NQ	NF	NF			UT	0.116139	0.0537405	0.298254	NQ	NF	NQ
	SMB	NF	0.748	NQ	NQ	NF	NF			SCB	0.034	0.178333	0.160667	0.0454086	NQ	0.0315
	Con	NF	NQ	NQ	NF	NF	NF			SMB	0.047	0.1695	0.174	0.0445	NQ	0.03
November										Con	0.0631971	0.135295	0.216627	0.0520475	NQ	0.037757
	ExUp	NF	NF	NF	NF	NF	NF		November
	Up	NF	0.761339	NF	NF	NF	NF			ExUp	0.210898	NQ	0.176459	NQ	NQ	NQ
	WB	NF	1.13559	NF	NF	NF	NF			Up	NQ	NQ	NQ	NQ	NQ	NQ
	FTA-1	NF	NF	NF	NF	NF	NF			WB	NQ	NQ	0.171222	NQ	NF	NQ
	SUT	NF	0.633208	NF	NF	NF	NF			FTA-1	NQ	NQ	NQ	NF	NF	NF
	SMB	NF	4.47894	NF	NQ	NQ	0			SUT	NQ	0.405612	0.392213	0.0578126	NQ	NQ
	Con	NF	0	NF	NF	NF	NF			SMB	0.220076	NQ	0.256549	NQ	NQ	NQ
March										Con	NQ	0.0678985	0.102374	NQ	NF	NQ
	Up	NQ	0.582021	NF	NQ	NQ	NQ		March
	WB	NQ	NQ	NF	NQ	NQ	NQ			WUp	NQ	NQ	0.677919	NQ	NF	NQ
	FTA-1	NQ	3.19391	4.89108	NQ	NQ	NQ			Up	0.106712	0.107093	0.38349	NQ	NQ	NQ
	UT	NQ	31.3849	7.72349	NQ	NQ	NQ			WB	NQ	0.23595	0.396488	NQ	NQ	NQ
	SUT	NQ	7.39225	2.15597	NQ	NQ	NQ			FTA-1	NQ	0.251978	0.237497	NQ	NQ	NQ
	SCB	NQ	0.94417	1.65529	NQ	NQ	NQ			UT	0.281934	2.48102	2.78595	0.365019	NQ	0.273388
	SMB	NQ	2.18059	2.02361	NQ	NQ	NQ			SUT	0.91575	2.58266	4.43147	0.299804	NQ	0.41364
	Con	NQ	6.30188	1.7459	NQ	NQ	NQ			SCB	NQ	0.210247	0.22092	NQ	NQ	NQ
Early May										SMB	0.521054	0.548769	1.45043	NQ	NQ	NQ
	WB	NF	NQ	NQ	NQ	NF	NF			Con	0.369591	1.64345	2.00139	0.204062	NQ	0.221272
	Con	NQ	5.53489	NQ	NQ	NQ	NQ		Early May
Late May										WB	NQ	0.11892	0.109509	NQ	NQ	NQ
	Up	NQ	0	0.171707	NQ	NQ	NQ			Con	NQ	0.258814	0.166541	0.0394737	NQ	NQ
	WB	NQ	2.78344	0	NQ	NQ	NF		Late May
	FTA-1	NQ	0.117898	0.168748	NQ	NF	NQ			Up	0.0726306	0.914618	0.494123	0.038111	NQ	NQ
	SCB	NQ	1.41155	0.294393	NQ	NF	NQ			WB	0.04063	0.856574	0.47659	0.0230989	NQ	0.00598264
	SMB	NQ	2.41569	0.0810943	NQ	NF	NQ			FTA-1	0.135692	1.38962	0.767775	0.0519984	NQ	0.0273095
	Con	NQ	6.22866	0.627688	NQ	NQ	NQ			SCB	0.063612	2.08499	0.482242	0.040634	NQ	0.0057506
June										SMB	0.252884	3.38529	1.30512	0.0757734	NQ	0.0663172
	Up	NQ	0.176826	NQ	NQ	NQ	NQ			Con	0.190843	2.71283	1.35801	0.146851	NQ	0.091763
	WB	NF	NQ	NF	NQ	NF	NF		June
	FTA-1	NQ	NQ	NQ	NQ	NF	NQ			Up	0.0202554	0.128828	0.0909013	0.0225148	0.0106553	0.0257479
	UT	NQ	1.93226	0.254407	NQ	NQ	NQ			WB	0.0220958	0.0928226	0.0814185	0.0227723	NQ	0.023521
	UT at SMB	NQ	1.04528	NQ	NQ	NQ	NQ			FTA-1	0.0308494	0.26878	0.119229	0.028178	0.0104697	0.0293839
	SCB	NQ	1.09388	0.195617	NQ	NQ	NQ			UT	0.0859459	1.91441	0.676621	0.145645	0.0289568	0.104444
	SMB	NQ	2.33365	NQ	NQ	NF	NQ			UT at SMB	0.0715428	2.75644	0.667644	0.14093	0.036422	0.095642
	Con	NQ	1.50122	0.27143	NQ	NQ	NQ			SCB	0.020906	0.0923572	0.0838967	0.0259962	NQ	0.0232944
	LFR	NF	NQ	NF	NF	NQ	NF			SMB	0.125229	0.300682	0.329402	0.0409871	0.0122131	0.0468429
	Lcon	NQ	4.26347	NQ	NQ	NQ	NQ			Con	0.0436609	0.239269	0.18616	0.0394766	0.0123014	0.0368329
July										LFR	NQ	NQ	NQ	NQ	NQ	NQ
	Up	NQ	NQ	NQ	NQ	NF	NQ			Con at FR	0.0374104	0.381754	0.184966	0.0479043	NQ	0.0374806
	WB	NQ	0.60675	NQ	NQ	NF	NQ			LCon	0.0502436	0.451983	0.238962	0.0572807	0.0143772	0.0440903
	FTA-1	NQ	0.706102	NQ	NQ	NQ	NQ		July
	UT	NF	2.02124	NQ	NQ	NQ	NQ			Up	0.254901	3.5805	1.71015	0.36493	0.0334772	0.253126
	SCB	NQ	0.135472	NQ	NQ	NF	NQ			WB	0.15801	1.11104	1.2116	0.175241	0	0.125928
	SMB	NQ	0.414731	NQ	NQ	NQ	NQ			FTA-1	0.10025	1.24223	1.03275	0.13463	-0.00173871	0.0993307
	Con	NQ	1.93079	NQ	NQ	NQ	NQ			UT	0.106666	7.06755	1.7224	0.341176	0.0267016	0.234301
	LFR	NF	NQ	NQ	NQ	NQ	NQ			SCB	0.0132088	0.163542	0.242649	0.0314468	0	0.0168999
	Con at FR	NF	NQ	NQ	NQ	NF	NF			SMB	0.113634	0.407645	0.530198	0.0207907	NQ	0.0259192
September										Con	0.0120471	0.418728	0.21845	0.0259555	0	0.0120982
	WB	NF	NQ	NF	NF	NF	NF			LFR	0	NQ	0	0	NF	0
	FTA-1	NQ	NQ	NQ	NQ	NQ	NQ			Con at FR	0.161069	2.99176	0.770908	0.197005	0	0.12422
	UT	NF	NQ	NF	NF	NF	NF		September
	SCB	NF	NF	NF	NF	NF	NF			WB	NF	NF	NF	NF	NF	NF
	SMB	NF	NQ	NF	NQ	NF	NF			FTA-1	NF	NQ	NQ	NQ	NF	NQ
	Con	NF	NQ	NF	NF	NF	NF			UT	NF	NQ	NQ	NF	NF	NF
										SCB	NQ	0.0645391	0.0611812	NQ	NF	NQ
										SMB	NQ	0.115516	NQ	NQ	NQ	NQ
NF = Not Found										Con	NF	NF	NQ	NF	NF	NF
NQ = Not Quantified
									NF = Not Found
									NQ = Not Quantified

## Sheet: Monthly
Table A.1 Perfluorinated compounds detected in sediment grab samples from locations of concern at Barksdale Air Force Base									Table A.6
									PFCs detected in water grab samples from locations of concern at Barksdale Air Force Base									LOQ = 10 ng/g
Month	Location	Concentration (ng/g)							Month	Location	Concentration (ng/mL)							LOD = 1 ng/g
		PFBS	PFOS	PFHxS	PFOA	PFNA	PFHpA				PFBS	PFOS	PFHxS	PFOA	PFNA	PFHpA
August									August
	ExUp	0.016	1.01747	0.0958	0.016	0.016	0.016			ExUp	0.00409836	0.0245228	0.0441293	0.0259778	0.00409836	0.0157004
	Up	0.0076	0.076	0.0456	0	0	0.0076			Up	0.0339325	0.0611685	0.104861	0.0314798	0.00316456	0.0209252
	WB	0.0167	1.0265	0.1004	0.0222	0	0.0089			WB	0.0275	0.180667	0.189333	0.0536667	0.0110272	0.032
	UT	0.0163	0.430534	0.098	0	0	0			FTA-1	0.03	0.153	0.1905	0.0565	0.0106431	0.0395
	SCB	0.0113	0.1132	0.0678	0.0462	0	0.0077			UT	0.116139	0.0537405	0.298254	0.0104167	0.00104167	0.0104167
	SMB	0.0156	0.748	0.0938	0.0386	0	0.0156			SCB	0.034	0.178333	0.160667	0.0454086	0.00297627	0.0315
	Con	0.0187	0.187	0.1122	0	0	0.0187			SMB	0.047	0.1695	0.174	0.0445	0.0106431	0.03
November										Con	0.0631971	0.135295	0.216627	0.0520475	0.00378788	0.037757
	ExUp	0.0200918	0.0200918	0.0200918	0.0200918	0.0200918	0.0200918		November
	Up	0.0122755	0.761339	0.0122755	0.0122755	0.0122755	0.0122755			ExUp	0.210898	0.01	0.176459	0.01	0.01	0.01
	WB	0.0115254	1.13559	0.0115254	0.0115254	0.0115254	0.0115254			Up	0.01	0.01	0.01	0.01	0.01	0.01
	FTA-1	0.00945741	0.00945741	0.00945741	0.00945741	0.00945741	0.00945741			WB	0.01	0.01	0.171222	0.01	0.001	0.01
	SUT	0.0102519	0.633208	0.0102519	0.0102519	0.0102519	0.0102519			FTA-1	0.01	0.01	0.01	0.001	0.001	0.001
	SMB	0.0127849	4.47894	0.0127849	0.127849	0.127849	0.0127849			SUT	0.01	0.405612	0.392213	0.0578126	0.01	0.01
	Con	0.0119259	0	0.0119259	0.0119259	0.0119259	0.0119259			SMB	0.220076	0.01	0.256549	0.01	0.01	0.01
March										Con	0.01	0.0678985	0.102374	0.01	0.001	0.01
	Up	0.094123	0.582021	0.0094123	0.094123	0.094123	0.094123		March
	WB	0.166459	0.166459	0.0166459	0.166459	0.166459	0.166459			WUp	0.00980392	0.00980392	0.677919	0.00980392	0	0.00980392
	FTA-1	0.0915206	3.19391	4.89108	0.0915206	0.0915206	0.0915206			Up	0.106712	0.107093	0.38349	0.00866852	0.00866852	0.00866852
	UT	0.192456	31.3849	7.72349	0.192456	0.192456	0.192456			WB	0.00968617	0.23595	0.396488	0.00968617	0.00968617	0.00968617
	SUT	0.109373	7.39225	2.15597	0.109373	0.109373	0.109373			FTA-1	0.00973899	0.251978	0.237497	0.00973899	0.00973899	0.00973899
	SCB	0.13369	0.94417	1.65529	0.13369	0.13369	0.13369			UT	0.281934	2.48102	2.78595	0.365019	0.00991277	0.273388
	SMB	0.109343	2.18059	2.02361	0.109343	0.109343	0.109343			SUT	0.91575	2.58266	4.43147	0.299804	0.0102754	0.41364
	Con	0.094353	6.30188	1.7459	0.094353	0.094353	0.094353			SCB	0.00968617	0.210247	0.22092	0.00968617	0.00968617	0.00968617
Early May										SMB	0.521054	0.548769	1.45043	0.00988142	0.00988142	0.00988142
	WB	0.00830407	0.0830407	0.0830407	0.0830407	0.00830407	0.00830407			Con	0.369591	1.64345	2.00139	0.204062	0.00991277	0.221272
	Con	0.254669	5.12424	0.254669	0.254669	0.254669	0.254669		Early May
Late May										WB	0.00931793	0.11892	0.109509	0.00931793	0.00931793	0.00931793
	Up	0.107061	0	0.171707	0.107061	0.107061	0.107061			Con	0.01	0.258814	0.166541	0.0394737	0.01	0.01
	WB	0.217865	2.78344	0.108932	0.217865	0.217865	0.0217865		Late May
	FTA-1	0.117	0.117898	0.168748	0.117	0.0117	0.117			Up	0.0726306	0.914618	0.494123	0.038111	0.0101709	0.0101709
	SCB	0.104111	1.41155	0.294393	0.104111	0.0104111	0.104111			WB	0.04063	0.856574	0.47659	0.0230989	0.0106746	0.00598264
	SMB	0.157303	2.41569	0.0810943	0.157303	0.0157303	0.157303			FTA-1	0.135692	1.38962	0.767775	0.0519984	0.0102459	0.0273095
	Con	0.142369	6.22866	0.627688	0.142369	0.142369	0.142369			SCB	0.063612	2.08499	0.482242	0.040634	0.00980008	0.0057506
June										SMB	0.252884	3.38529	1.30512	0.0757734	0.0105664	0.0663172
	Up	0.108359	0.176826	0.108359	0.108359	0.108359	0.108359			Con	0.190843	2.71283	1.35801	0.146851	0.0096043	0.091763
	WB	0.011155	0.11155	0.011155	0.11155	0.011155	0.011155		June
	FTA-1	0.0951294	0.0951294	0.0951294	0.0951294	0.00951294	0.0951294			Up	0.0202554	0.128828	0.0909013	0.0225148	0.0106553	0.0257479
	UT	0.0859191	1.93226	0.254407	0.0859191	0.0859191	0.0859191			WB	0.0220958	0.0928226	0.0814185	0.0227723	0.00972384	0.023521
	UT at SMB	0.148255	1.04528	0.148255	0.148255	0.148255	0.148255			FTA-1	0.0308494	0.26878	0.119229	0.028178	0.0104697	0.0293839
	SCB	0.0684182	1.09388	0.195617	0.0684182	0.0684182	0.0684182			UT	0.0859459	1.91441	0.676621	0.145645	0.0289568	0.104444
	SMB	0.0841751	2.33365	0.0841751	0.0841751	0.00841751	0.0841751			UT at SMB	0.0715428	2.75644	0.667644	0.14093	0.036422	0.095642
	Con	0.0716846	1.50122	0.27143	0.0716846	0.0716846	0.0716846			SCB	0.020906	0.0923572	0.0838967	0.0259962	0.00966744	0.0232944
	LFR	0.00713226	0.0713226	0.00713226	0.00713226	0.0713226	0.00713226			SMB	0.125229	0.300682	0.329402	0.0409871	0.0122131	0.0468429
	LCon	0.779727	4.26347	0.779727	0.779727	0.779727	0.779727			Con	0.0436609	0.239269	0.18616	0.0394766	0.0123014	0.0368329
July										LFR	0.00954927	0.00954927	0.00954927	0.00954927	0.00954927	0.00954927
	Up	0.108774	0.108774	0.108774	0.108774	0.0108774	0.108774			Con at FR	0.0374104	0.381754	0.184966	0.0479043	0.0103178	0.0374806
	WB	0.105352	0.60675	0.105352	0.105352	0.0105352	0.105352			LCon	0.0502436	0.451983	0.238962	0.0572807	0.0143772	0.0440903
	FTA-1	0.0951973	0.706102	0.0951973	0.0951973	0.0951973	0.0951973		July
	UT	0.0116469	2.02124	0.116469	0.116469	0.116469	0.116469			Up	0.254901	3.5805	1.71015	0.36493	0.0334772	0.253126
	SCB	0.0963948	0.135472	0.0963948	0.0963948	0.00963948	0.0963948			WB	0.15801	1.11104	1.2116	0.175241	0.00542535	0.125928
	SMB	0.0830013	0.414731	0.0830013	0.0830013	0.0830013	0.0830013			FTA-1	0.10025	1.24223	1.03275	0.13463	0.0046503	0.0993307
	Con	0.104841	1.93079	0.104841	0.104841	0.104841	0.104841			UT	0.106666	7.06755	1.7224	0.341176	0.0267016	0.234301
	LFR	0.0150137	0.150137	0.150137	0.150137	0.150137	0.150137			SCB	0.0132088	0.163542	0.242649	0.0314468	0.00526094	0.0168999
	Con at FR	0.00934929	0.0934929	0.0934929	0.0934929	0.00934929	0.00934929			SMB	0.113634	0.407645	0.530198	0.0207907	0.0108838	0.0259192
September										Con	0.0120471	0.418728	0.21845	0.0259555	0.00518027	0.0120982
	WB	0.0116185	0.116185	0.0116185	0.0116185	0.0116185	0.0116185			LFR	0.00959693	0.00959693	0.00959693	0.00959693	0.000959693	0.00959693
	FTA-1	0.100644	0.100644	0.100644	0.100644	0.100644	0.100644			Con at FR	0.161069	2.99176	0.770908	0.197005	0.00859993	0.12422
	UT	0.0116185	0.116185	0.0116185	0.0116185	0.0116185	0.0116185		September
	SCB	0.00951173	0.00951173	0.00951173	0.00951173	0.00951173	0.00951173			WB	0.00103348	0.00103348	0.00103348	0.00103348	0.00103348	0.00103348
	SMB	0.00826876	0.0826876	0.00826876	0.0826876	0.00826876	0.00826876			FTA-1	0.00114521	0.0114521	0.0114521	0.0114521	0.00114521	0.0114521
	Con	0.0108225	0.108225	0.0108225	0.0108225	0.0108225	0.0108225			UT	0.00107805	0.0107805	0.0107805	0.00107805	0.00107805	0.00107805
										SCB	0.010989	0.0645391	0.0611812	0.010989	0.0010989	0.010989
										SMB	0.0107619	0.115516	0.0107619	0.0107619	0.0107619	0.0107619
										Con	0.00113688	0.00113688	0.0113688	0.00113688	0.00113688	0.00113688

## Sheet: Monthly % Rec.
Percent Recovery in Sediment Samples						Percent Recovery in Water Samples
Month	Location	Percent Recovery (%)				Month	Location	Percent Recovery (%)
		PFHxA-C13	PFDA-C13	NEtFOSAA-d5				PFHxA-C13	PFDA-C13	NEtFOSAA-d5
August						August
	ExUp	52.348	29.965	1.5			ExUp	73.551	57.2821	62.0267
	Up	10.386	1.5	1.5			Up	125.802	68.7069	79.1816
	WB	35.288	3.787	1.5			WB	120.635	101.687	97.2997
	UT	20.973	2.464	1.5			FTA-1	124.762	101.3	80.7963
	SCB	16.405	1.125	1.5			UT	260.337	142.504	117.098
	SMB	4.584	1.5	1.5			SCB	97.4378	58.0954	60.5006
	Con	24.577	1.5	1.5			SMB	161.221	131.592	110.608
November							Con	104.171	58.3939	57.0813
	ExUp	2.5	2.97306	5.95012		November
	Up	37.7306	54.7143	2.5			ExUp	140.549	77.2133	86.5473
	WB	146.918	115.467	26.9225			Up	127.738	33.0051	83.8627
	FTA-1	15.0128	55.148	1.70509			WB	105.431	47.0087	53.2087
	SUT	2.5	13.0071	2.5			FTA-1	162.748	40.622	74.8398
	SMB	2.5	11.4168	2.5			SUT	81.0214	49.0575	48.1162
	Con	2.5	2.5	2.5			SMB	148.393	52.3035	74.2576
March							Con	81.6964	57.8904	48.8395
	Up	183.089	70.3124	14.9949		March
	WB	56.9515	20.3575	3.76613			WUp	829.743	22.7348	57.8987
	FTA-1	215.66	371.74	143.853			Up	400.129	32.8988	42.8969
	UT	400.939	129.553	69.6595			WB	445.416	363.284	368.496
	SUT	126.781	29.3191	8.96275			FTA-1	454.747	140.416	143.998
	SCB	26.4391	37.4479	4.2787			UT	384.315	68.8774	66.6623
	SMB	113.189	36.8678	8.3376			SUT	507.813	49.4441	64.154
	Con	358.937	133.794	68.6122			SCB	374.444	119.996	116.384
Early May							SMB	999.476	232.199	259.575
	WB	14.0958	13.9808	1.77318			Con	1197.95	350.181	353.67
	Con	23.5971	27.0915	9.55993		Early May
Late May							WB	98.0636	76.5533	66.7144
	Up	57.777	45.8472	39.0287			Con	119.333	67.2988	56.145
	WB	47.132	41.9068	38.1537		Late May
	FTA-1	56.9854	41.957	37.138			Up	151.947	70.5091	74.6929
	SCB	54.5437	44.9584	37.2161			WB	127.713	101.624	98.1754
	SMB	50.9283	47.9892	41.7869			FTA-1	187.319	71.4001	84.8647
	Con	52.661	43.8155	38.3331			SCB	135.642	104.406	104.044
June							SMB	117.153	98.8411	93.6841
	Up	42.6074	31.4948	15.0671			Con	161.697	68.295	78.2845
	WB	51.1261	26.1004	18.3218		June
	FTA-1	41.0677	20.2091	11.1879			Up	76.4386	61.4068	56.4317
	UT	62.4377	27.3111	20.2406			WB	65.0323	39.841	35.3142
	UT at SMB	40.8255	25.8544	15.5011			FTA-1	70.0046	51.3696	49.9773
	SCB	71.7031	28.8253	11.8773			UT	89.1053	65.014	61.6989
	SMB	92.9742	55.6679	46.7371			UT at SMB	87.7057	66.2532	61.0226
	Con	63.6516	33.2752	23.0247			SCB	72.8425	56.8716	48.9428
	LFR	11.6448	10.7004	6.41401			SMB	134.457	75.0846	77.9697
	Lcon	42.4796	17.7025	7.22942			Con	82.7503	57.3265	58.7839
July							LFR	105.152	65.5819	69.286
	Up	43.486	6.76763	0.5			Con at FR	117.052	73.2988	71.2098
	WB	28.3139	10.6627	1.38222			LCon	122.84	90.2671	83.4459
	FTA-1	29.6939	13.0753	2.30693		July
	UT	47.3536	26.734	19.7458			Up	810.388	545.353	551.012
	SCB	23.3763	8.08056	0.5			WB	210.577	210.577	174.412
	SMB	39.3964	23.3222	5.84281			FTA-1	175.313	175.313	167.678
	Con	53.4066	29.4672	8.72322			UT	64.7686	64.7686	56.4766
	LFR	37.9171	41.511	20.8451			SCB	31.575	31.575	36.0943
	Con at FR	33.3091	23.7272	5.72945			SMB	54.5636	54.5636	59.5554
September							Con	26.4549	26.4549	32.7234
	WB	45.298	45.8223	35.9396			LFR	193.657	193.657	206.657
	FTA-1	52.3889	29.0017	41.0044			Con at FR	108.897	108.897	100.496
	UT	27.9447	21.5696	40.2788		September
	SCB	37.3583	37.4106	24.2539			WB	65.6405	37.8364	55.837
	SMB	33.7889	30.8619	23.839			FTA-1	52.3889	52.4478	52.9507
	Con	31.3529	28.9444	22.0422			UT	27.9447	40.6481	85.2573
							SCB	37.3583	65.7808	55.0784
							SMB	33.7889	30.6509	30.6031
NF = Not Found							Con	31.3529	62.0123	53.2856
NQ = Not Quantified
						NF = Not Found
						NQ = Not Quantified

## Sheet: RLs and blanks
Table 5.3 Perfluorinated compounds detected in sediment grab samples from reference locations at Barksdale Air Force Base									Table A.7									Table A.8
									PFCs detected in water grab samples from reference locations at Barksdale Air Force Base									PFCs detected in field reagent blanks and lab blanks
Month	Reference Location	Concentration (ng/g)							Month	Reference Location	Concentration (ng/mL)							Month	Sample	Concentration (ng/mL)
		PFBS	PFOS	PFHxS	PFOA	PFNA	PFHpA				PFBS	PFOS	PFHxS	PFOA	PFNA	PFHpA				PFBS	PFOS	PFHxS	PFOA	PFNA	PFHpA
August									August									August
	FR	0.0153	0.0652	0.0652	0	0	0.0153			FR	0.00437406	0.00437406	0.00437406	0.00437406	0.00437406	0.00437406			FRB	0.001	0.001	0.001	0.001	0.001	0.001
	FL	0.0097	0.0584	0.0584	0	0	0			FL	0.000871394	0.00871394	0.000871394	0.00871394	0.00871394	0.069			LB	0.001	0.001	0.001	0.001	0.001	0.001
November									November									November
	FR	0.0170707	0.0170707	0.0170707	0.0170707	0.0170707	0.0170707			FR	0.183216	0.01	0.156607	0.01	0.01	0.01			FRB	0.208989	0.01	0.182816	0.01	0.01	0.01
March										FL	0.01	0.01	0.01	0.001	0.001	0.001			LB	0.01	0.01	0.01	0.01	0.01	0.01
	FR	0.0141435	0.141435	0.0141435	0.0141435	0.141435	0.0141435		March									March
Early May										FR	0.00980392	0.00980392	0.362593	0.00980392	0.00980392	0.00980392			FRB	0.000871688	0.00871688	0.000871688	0.00871688	0.00871688	0.000871688
	FR	0.0208333	0.208333	0.208333	0.208333	0.0208333	0.0208333		Early May										LB	0.001	0.001	1.62943	0.001	0.001	0.001
Late May										FR	0.00878426	0.00878426	0.00878426	0.00878426	0.00878426	0.00878426		Early May
	FL	0.00528631	0.0528631	0.0528631	0.0528631	0.0528631	0.00528631		Late May										FRB	0.000870171	0.000870171	0.000870171	0.00870171	0.00870171	0.000870171
June										FL	0.010012	0.010012	0.010012	0.010012	0.010012	0.010012			LB	0.001	0.001	0.001	0.001	0.01	0.001
	FR	0.0109476	0.109476	0.0109476	0.109476	0.0109476	0.0109476		June									Late May
	FL	0.0048939	0.048939	0.048939	0.0048939	0.0048939	0.048939			FR	0.00929714	0.00929714	0.00929714	0.00929714	0.00929714	0.00929714			FRB	0.0107434	0.0107434	0.0107434	0.0107434	0.0107434	0.0107434
July										FL	0.00943396	0.00943396	0.00943396	0.00943396	0.00943396	0.00943396			LB	0.001	0.01	0.001	0.01	0.01	0.001
	FR	0.0110229	0.110229	0.110229	0.0110229	0.0110229	0.0110229		July									June
September										FR	0.0109842	0.00549209	0.00549209	0.00168199	0.00549209	0.00549209			FRB	0.00100969	0.00100969	0.00100969	0.00100969	0.0100969	0.00100969
	FR	0.00977173	0.00977173	0.00977173	0.00977173	0.00977173	0.00977173			FL	0.0101626	0.0101626	0.0101626	0.0101626	0.0101626	0.0101626			LB	0.001	0.001	0.001	0.001	0.001	0.001
									September									July
										FR	0.00108885	0.00108885	0.0108885	0.0108885	0.00108885	0.00108885			FRB	0.00102838	0.00102838	0.00102838	0.00102838	0.00102838	0.00102838
																			LB	0.001	0.001	0.001	0.001	0.001	0.001
																		September
																			FRB	0.00102796	0.122113	0.0102796	0.00102796	0.00102796	0.00102796
																			LB	0.001	0.001	0.001	0.001	0.001	0.001

## Sheet: RLs and blanks % Rec.
Percent Recovery in Sediment Samples						Percent Recovery in Water Samples						Percent Recovery in Water Samples
Month	Reference Location	Percent Recovery (%)				Month	Reference Location	Percent Recovery (%)				Month	Reference Location	Percent Recovery (%)
		PFHxA-C13	PFDA-C13	NEtFOSAA-d5				PFHxA-C13	PFDA-C13	NEtFOSAA-d5				PFHxA-C13	PFDA-C13	NEtFOSAA-d5
August						August						August
	FR	33.045	3.416	1.5			FR	141.246	77.9265	82.955			FRB	165.559	137.186	147.909
	FL	33.53	15.048	1.5			FL	105.383	111.674	108.05			LB	15.4864	157.658	136.314
November						November						November
	FR	0	18.4218	0			FR	124.46	79.1502	83.5039			FRB	118.676	70.2804	83.5789
March							FL	115.628	64.3411	63.2144			LB	49.9691	75.2619	77.6333
	FR	50.8175	26.614	7.61768		March						March
Early May							FR	387.893	55.4667	95.1591			FRB	507.298	160.241	168.215
	FR	14.2397	20.2141	7.02999		Early May							LB	244.182	1346.91	507.037
Late May							FR	130.362	78.4266	69.7862		Early May
	FL	52.6009	54.0058	41.8162		Late May							FRB	143.816	110.795	116.289
June							FL	128.247	104.599	106.242			LB	8.98955	117.962	64.2161
	FR	41.9746	41.147	19.9274		June						Late May
	FL	65.2965	71.4553	30.7836			FR	41.9746	41.147	19.9274			FRB	127.387	116.758	113.054
July							FL	65.2965	71.4553	30.7836			LB	39.1957	106.361	91.4652
	FR	29.0633	31.4823	10.3469		July						June
September							FR	510.061	245.284	280.423			FRB	133.42	111.397	109.69
	FR	50.8415	66.9139	55.1379			FL	374.319	131.055	214.714			LB	21.702	89.625	70.533
						September						July
							FR	73.7825	57.5949	52.1653			FRB	2.5	29.1329	2.5
NF = Not Found													LB	2.5	117.288	46.6739
NQ = Not Quantified												September
						NF = Not Found							FRB	73.7982	67.5986	74.8102
						NQ = Not Quantified							LB	16.0829	62.5862	49.7212
												NF = Not Found
												NQ = Not Quantified
